# Supplementary material for: Wavelength-interrogated surface plasmon resonance sensor with mesoporous-silica-film-enhanced sensitivity to small molecules
Source: Royal Society of Chemistry journal article supplement (doi:10.1039/c2an16057a), 2012-01-01
Supplement: c2an16057a.pdf [file c2an16057a.pdf]

(Electronic Supplementary information)

**Wavelength-interrogated surface plasmon resonance sensor  
with mesoporous-silica-film-enhanced sensitivity to small  
molecules**

Zhe Zhang<sup>a</sup>, Dan-feng Lu<sup>a</sup>, Qian Liu<sup>a</sup>, Zhi-mei Qi<sup>a\*</sup>, Liangbao Yang<sup>b</sup>, Jinhuai Liu<sup>b</sup>

<sup>a</sup>State Key Laboratory of Transducer Technology, Institute of Electronics, Chinese Academy of Sciences, Beijing 100190, China.

<sup>b</sup>Institute of Intelligent Machines, Chinese Academy of Sciences, Hefei 230031, China

\*Corresponding author, Fax: 86 10 5888 7196; Tel: 86 10 5888 7196; E-mail: [zhimei-qi@mail.ie.ac.cn](mailto:zhimei-qi@mail.ie.ac.cn)

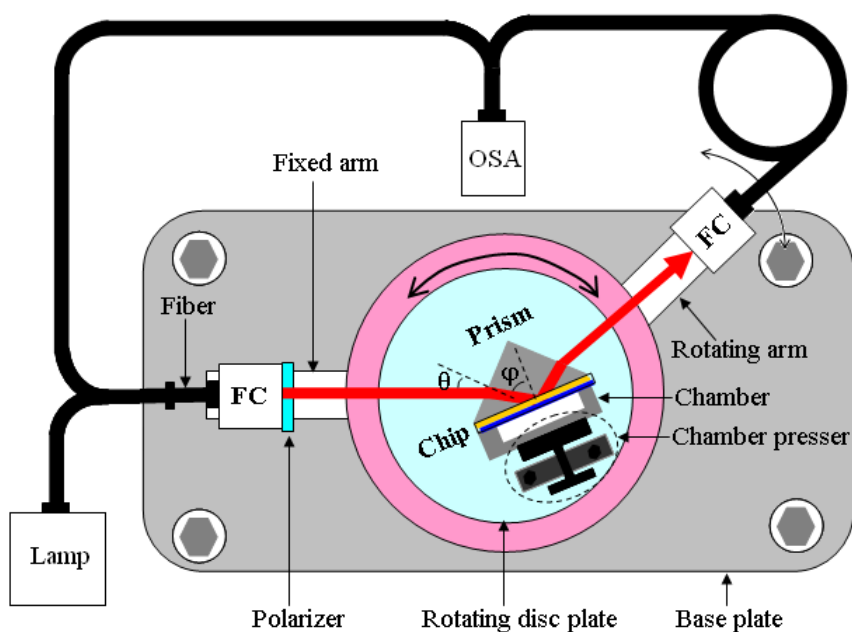

(a)

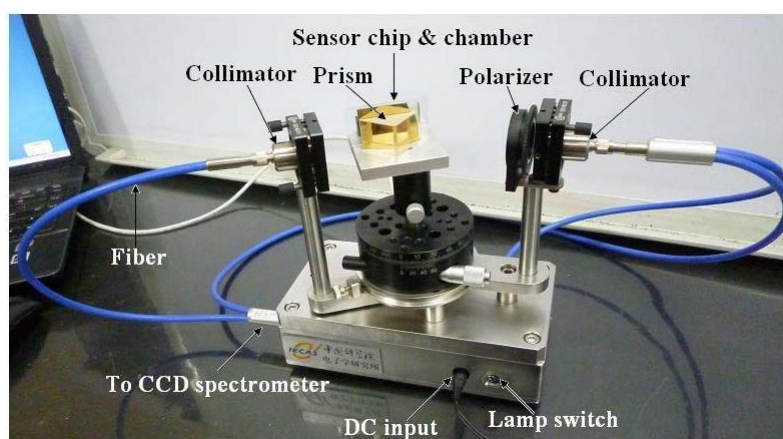

(b)

**Fig. S1** (a) Top-view schematic diagram of the wavelength-interrogated compact SPR sensor platform used in this work (FC: fiber collimator); (b) Photograph of the home-made device.
